# Supplementary material
Source: MDPI journal article supplement (https://www.mdpi.com/2227-9040/11/4/234)
Supplement: s1 [file s1]

*Supplementary Materials*

# **An Impedimetric Biosensing Strategy Based on Bicyclic Peptides as Bioreceptors for Monitoring h-uPA Cancer Biomarkers**

**Giulia Moro** <sup>1,\*,+‡</sup>, **Leonardo Ferrari** <sup>1,†</sup>, **Alessandro Angelini** <sup>1,2</sup> and **Federico Polo** <sup>1,2,\*</sup>

<sup>1</sup> Department of Molecular Sciences and Nanosystems, Ca' Foscari University of Venice, 30172 Venice, Italy; 860685@stud.unive.it (L.F.); alessandro.angelini@unive.it (A.A.)

<sup>2</sup> European Centre for Living Technology (ECLT), Ca' Bottacin, 30124 Venice, Italy

\* Correspondence: giulia.moro@unive.it (G.M.); federico.polo@unive.it (F.P.);

† These authors contributed equally to this work.

‡ Current affiliation: Department of Pharmaceutical Sciences, University of Naples, Federico II, 80131 Naples, Italy.

**Table S1.** Comparison of biosensing strategies developed recently for h-uPA detection spiked buffer solutions and biological fluids.

| Biorecognition layer components | Detection strategy        | Matrices tested           | Dynamic range (ng mL <sup>-1</sup> )  | LOD (ng mL <sup>-1</sup> ) | LOQ (ng mL <sup>-1</sup> ) | Sample volumes (μL) | Assay time* | Reference |
|---------------------------------|---------------------------|---------------------------|---------------------------------------|----------------------------|----------------------------|---------------------|-------------|-----------|
| Bicyclic peptide                | Impedimetric              | PBS**                     | 10–1×10 <sup>2</sup>                  | 9                          | 30                         | 20                  | ~ 45 min    | Present   |
| Bicyclic peptide                | Voltammetric (DPV)        | PBS + Diluted human serum | 0–5×10 <sup>2</sup>                   | 32.5                       | -                          | 10                  | ~ 1 h       | [1]       |
| Antibody                        | Fluorescence              | PBS + Fetal Bovin Serum + | 3.3–3.3×10 <sup>3</sup>               | 3.3                        | -                          | 20                  | ~ 1 h       | [2]       |
| Antibody                        | Photoelectrochemical      | PBS + Human serum         | 1×10 <sup>-4</sup> –1×10 <sup>3</sup> | 3.3×10 <sup>-5</sup>       | -                          | 30                  | ~ 1 h       | [3]       |
| Aptamer                         | Impedimetric Voltammetric | PBS + Diluted human serum | 3.3×10 <sup>-2</sup> –33              | 3.3×10 <sup>-2</sup>       | -                          | -                   | ~ 30 min    | [4]       |

\*Assay time is referred to the time of incubation of h-uPA and analysis. \*\* Phosphate buffer saline

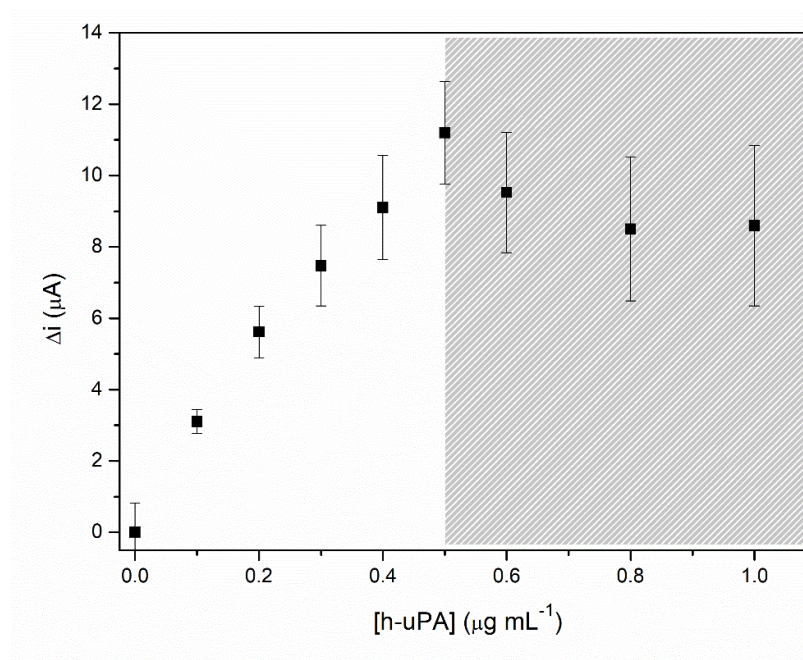

**Figure S1.** The response of P<sub>3</sub>-based assay in presence of h-uPA concentrations ranging 0.1 to 1 μg mL<sup>-1</sup>.

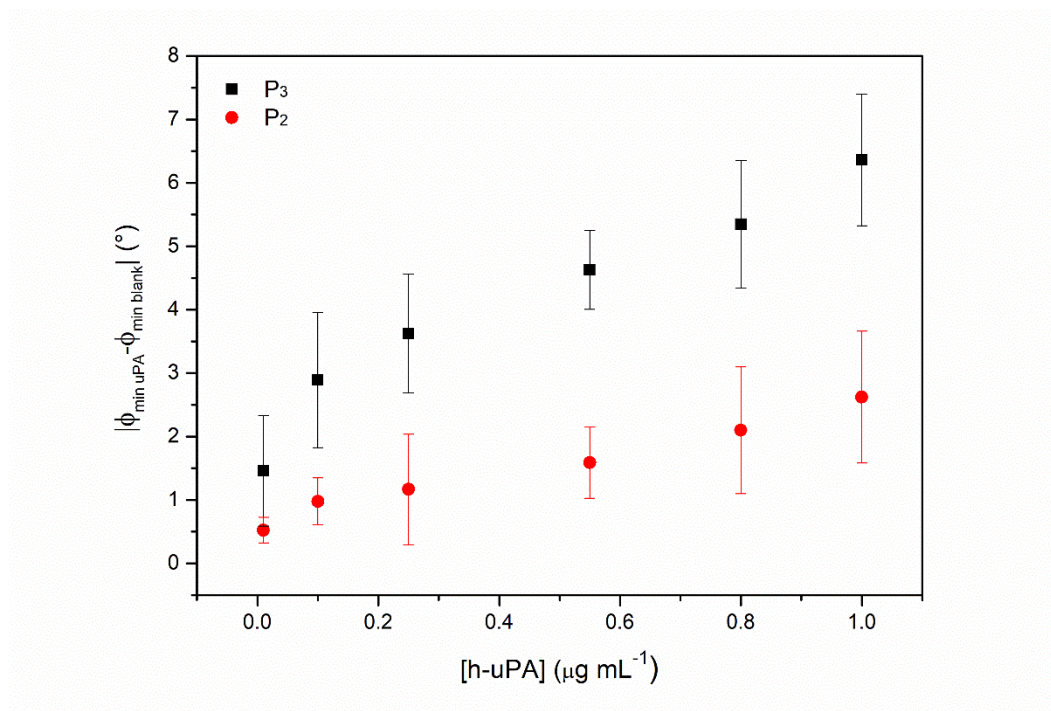

**Figure S2.** Comparison between the calibration plots obtained with P<sub>2</sub> (red circles) and P<sub>3</sub> (black squares) as bioreceptors in this impedimetric-based assay. The calibration curve of P<sub>3</sub>-based assay shows a greater linear slope compared to P<sub>2</sub> one. This trend is consistent with the ones observed for the voltammetric sandwich type assay presented in **Figure 3**. The choice of P<sub>3</sub> as bioreceptor provides a higher sensibility to the platform compared to P<sub>2</sub>. The error associated to the response of the two platforms expressed as standard deviation has the same order of magnitude for both P<sub>2</sub> and P<sub>3</sub>.

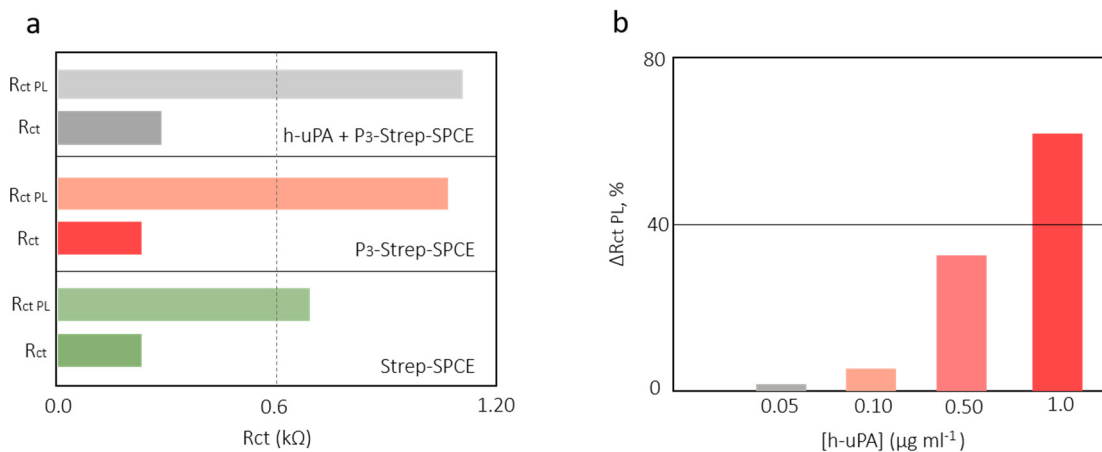

| Type of SPCE                          | Rs, Ω      | Rct, kΩ     | Rct PL, kΩ  |
|---------------------------------------|------------|-------------|-------------|
| <b>Bare-SPCE</b>                      | 41.2 ± 2.3 | 2.10 ± 0.07 | -           |
| <b>Strep-SPCE</b>                     | 36.1 ± 0.7 | 0.25 ± 0.01 | 0.75 ± 0.05 |
| <b>P<sub>3</sub>-Strep-SPCE</b>       | 31.2 ± 1.8 | 0.27 ± 0.01 | 1.17 ± 0.07 |
| <b>h-uPA (0.1 µg mL<sup>-1</sup>)</b> | 36.4 ± 2.4 | 0.34 ± 0.01 | 1.20 ± 0.08 |

**Figure S3.** (a) Comparison of the Rct and RctPL values of Strep-SPCE, P<sub>3</sub>-Strep-SPCE, h-uPA-P<sub>3</sub>-Strep-SPCE. The values were obtained fitting the Nyquist plots in Figure 4a with the EECs in Figure 4c–e described in the main text. (b) Relative variation of Rct PL upon incubation of samples spiked with increasing concentration of h-uPA. (c) Summary of the values of all resistance components present in the EECs used to fit the EIS data.

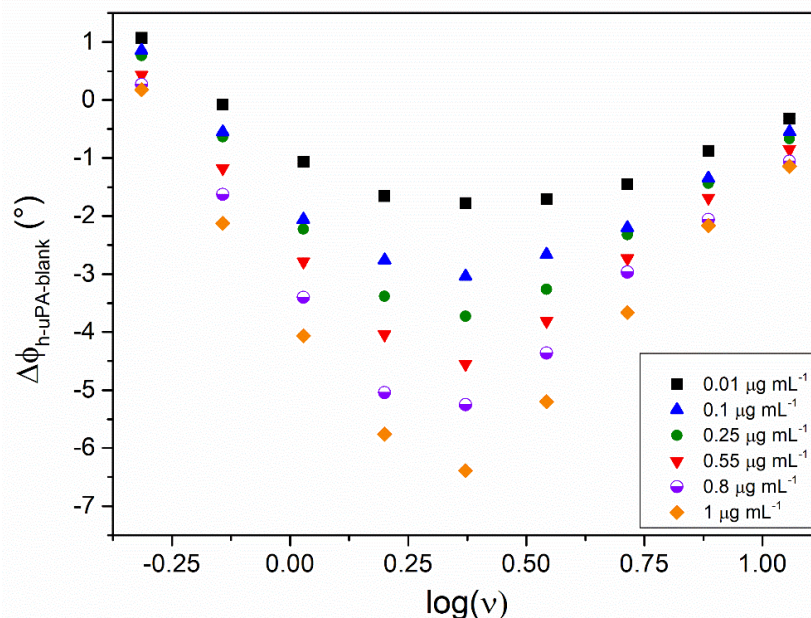

**Figure S4.** Bode phase peaks, subtracted from the respective blanks, of the 6 h-uPA concentrations tested in the impedimetric P<sub>3</sub>-based platform.

## References

1. Moro, G.; Severin Sfragano, P.; Ghirardo, J.; Mazzocato, Y.; Angelini, A.; Palchetti, I.; Polo, F. Bicyclic Peptide-Based Assay for UPA Cancer Biomarker. *Biosens. Bioelectron.* **2022**, *213*, 114477. <https://doi.org/10.1016/j.bios.2022.114477>.
2. Sharma, B.; Parajuli, P.; Podila, R. Rapid Detection of Urokinase Plasminogen Activator Using Flexible Paper-Based Graphene-Gold Platform. *Biointerphases* **2020**, *15*. <https://doi.org/10.1116/1.5128889>.
3. Liu, X.P.; Chen, J.S.; Mao, C.J.; Niu, H.L.; Song, J.M.; Jin, B.K. A Label-Free Photoelectrochemical Biosensor for Urokinase-Type Plasminogen Activator Detection Based on a g-C<sub>3</sub>N<sub>4</sub>/CdS Nanocomposite. *Anal. Chim. Acta* **2018**, *1025*. <https://doi.org/10.1016/j.aca.2018.04.051>.
4. Jarczewska, M.; Kékedy-Nagy, L.; Nielsen, J.S.; Campos, R.; Kjems, J.; Malinowska, E.; Ferapontova, E.E. Electroanalysis of PM-Levels of Urokinase Plasminogen Activator in Serum by Phosphorothioated RNA Aptamer. *Analyst* **2015**, *140*. <https://doi.org/10.1039/c4an02354d>.
